# Supplementary material for: Persistence and spillback of mammal-adapted H5N1 genotype B3.2 viruses among South American seabirds and marine mammals
Source: Research Square preprint supplement (doi:10.21203/rs.3.rs-7960151/v1), 2025-11-04
Supplement: Supplementary file 1 [file 13ce7526c349bd06457bcb77.docx]

**Supplementary Figure 1. Spatial dissemination of H5N1-B3.2 virus in South America in birds and marine mammals.** Same map as Figure 2, only presented for four different time periods. For the avian subclade (top row, left to right): (a) 13 September 2022 – 10 November 2022, (b) 13 September 2022 – 12 February 2023, (c) 13 September 2022 – 17 April 2023, (d) 13 September 2022 – 9 December 2023. For the mammalian subclade (bottom row, left to right): (a) 5 December 2022 – 9 February 2023, (b) 5 December 2022 – 6 April 2023, (c) 5 December 2022 – 8 May 2023, (d) 5 December 2022 – 12 January 2024.

**Supplementary Figure 2. Sublineage distribution of H5N1 marine mammal subclade viruses detected along the northern Patagonian coast of Argentina.** Species are colored according to the viral sublineage and diagnostic results (legend is shown). Species are abbreviated as follows: CATE – Cayenne tern (*Thalasseus acuflavidus eurygnathus*), GRGR – great grebe (*Podiceps major*), KEGU – kelp gull (*Larus dominicanus*), IMCO – imperial cormorant (*Leucocarbo atriceps*), ROTE – royal tern (*Thalasseus maximus*), SAFS – South American fur seal (*Arctocephalus australis*), SASL – South American sea lion (*Otaria byronia*), SATE – South American tern (*Sterna hirundinacea*), SIGR – silvery grebe (*Podiceps occipitalis*), SOES – southern elephant seal (*Mirounga leonina*), WHSD – white-headed steamer duck (*Tachyeres leucocephalus*). Boxes indicate species and locations where the N701D reversion in PB2 was observed (Figures 3-4).

**Supplementary Figure 3.** **Phylogenetic tree including A/cayenne tern/Argentina/CH-PM093/2024.** A subsection of the ML tree is provided, including an additional virus for which a partial genome sequence is available (GenBank accession code: PV717661–PV717665): A/cayenne tern/Argentina/CH-PM093/2024, collected on 12 February 2024. The genome sequence lacks the NA segment and fragments of PB2 and PB1 genes. Red color highlight viruses with the N701D reversion in PB2.

**Supplementary Figure 4. Percentage of sequence reads with PB2 N701D reversion.** The shade of the circle at the tip is proportional to the percentage of sequence reads with the N701D reversion in PB2. Data are shown for 16 newly full-genome sequenced strains from this study, including viruses from marine mammals (n = 1) and seabirds (n = 15). The monophyletic cluster of five tern viruses carrying the N701D reversion in PB2 is highlighted in a grey rectangle.
