# Supplementary material for: Persistence and spillback of mammal-adapted H5N1 genotype B3.2 viruses among South American seabirds and marine mammals
Source: Research Square preprint supplement (doi:10.21203/rs.3.rs-7960151/v1), 2025-11-04
Supplement: Supplementary file 2 [file b0bc8edb676b80e427dc22fe.xlsx]

## Sheet: SuppTable1
N	Identification	Species	CommonName	Group	Date	Site	Province	Latitude	Longitude	Age	Sex	Status	PreservationScore	RTqPCR	GenomeSequence	IsolateName	GenBank	Sublineage	NecropsyNotes	PreviousPublication
1	RN-PB002	Otaria byronia	South American Sea Lion	Mammal	2023-08-26	Punta Bermeja	Río Negro	-41.1558	-63.1323	Adult	Female	Dead	2 - Fresh carcass	Positive	NA	NA	NA	NA	Carcass in rigor mortis.	Rimondi et al 2024
2	RN-PB003	Otaria byronia	South American Sea Lion	Mammal	2023-08-26	Punta Bermeja	Río Negro	-41.1558	-63.1323	Juvenile	Female	Dead	2 - Fresh carcass	Positive	NA	NA	NA	NA	Carcass in rigor mortis.	Rimondi et al 2024
3	RN-PB004	Otaria byronia	South American Sea Lion	Mammal	2023-08-26	Punta Bermeja	Río Negro	-41.1558	-63.1323	Sub-adult	Male	Dead	2 - Fresh carcass	Positive	Partial	A/South american sea lion/Argentina/RN-PB004/2023	OR987081-OR987088	2	Carcass still warm and in rigor mortis.	Rimondi et al 2024
4	RN-PB005	Otaria byronia	South American Sea Lion	Mammal	2023-08-26	Punta Bermeja	Río Negro	-41.1558	-63.1323	Adult	Male	Dead	2 - Fresh carcass	Positive	NA	NA	NA	NA	Carcass in rigor mortis.	Rimondi et al 2024
5	RN-PB006	Otaria byronia	South American Sea Lion	Mammal	2023-08-26	Punta Bermeja	Río Negro	-41.1558	-63.1323	Sub-adult	Female	Dead	2 - Fresh carcass	Positive	NA	NA	NA	NA	Carcass in rigor mortis.	Rimondi et al 2024
6	RN-PB007	Otaria byronia	South American Sea Lion	Mammal	2023-08-26	Punta Bermeja	Río Negro	-41.1558	-63.1323	Sub-adult	Female	Dead	2 - Fresh carcass	Positive	Whole	A/South american sea lion/Argentina/RN-PB007/2023	OR987089-OR987096	1	Carcass in rigor mortis.	Rimondi et al 2024
7	RN-PB008	Otaria byronia	South American Sea Lion	Mammal	2023-08-26	Punta Bermeja	Río Negro	-41.1558	-63.1323	Sub-adult	Male	Dead	2 - Fresh carcass	Positive	NA	NA	NA	NA	Carcass in rigor mortis.	Rimondi et al 2024
8	RN-PB009	Otaria byronia	South American Sea Lion	Mammal	2023-08-26	Punta Bermeja	Río Negro	-41.1558	-63.1323	Adult	Male	Dead	2 - Fresh carcass	Positive	NA	NA	NA	NA	Animal was seen and filmed agonizing, died shortly after and carcass was still extremely fresh when sampling was conducted. Clinical signs: lying down and unable to move, pebbles surrounding animals suggested it had been thrashing around, muscular tremors, erratic head/neck movement, marked dyspnoea, large quantity of greenish mucus coming out of mouth. During sample collection, carcass felt unus…	Rimondi et al 2024
9	RN-PB010	Otaria byronia	South American Sea Lion	Mammal	2023-08-26	Punta Bermeja	Río Negro	-41.1558	-63.1323	Juvenile	Female	Dead	2 - Fresh carcass	Positive	NA	NA	NA	NA	Carcass in rigor mortis.	Rimondi et al 2024
10	RN-PB011	Otaria byronia	South American Sea Lion	Mammal	2023-08-26	Punta Bermeja	Río Negro	-41.1558	-63.1323	Adult	Male	Dead	2 - Fresh carcass	Positive	Whole	A/South american sea lion/Argentina/RN-PB011/2023	OR987097-OR987104	2	Carcass in rigor mortis.	Rimondi et al 2024
11	RN-PB012	Otaria byronia	South American Sea Lion	Mammal	2023-08-26	Punta Bermeja	Río Negro	-41.1558	-63.1323	Adult	Male	Dead	2 - Fresh carcass	Positive	NA	NA	NA	NA	Carcass in rigor mortis.	Rimondi et al 2024
12	RN-PB013	Otaria byronia	South American Sea Lion	Mammal	2023-08-26	Punta Bermeja	Río Negro	-41.1558	-63.1323	Adult	Female	Dead	2 - Fresh carcass	Positive	Whole	A/South american sea lion/Argentina/RN-PB013/2023	OR987105-OR987112	2	Carcass in rigor mortis.	Rimondi et al 2024
13	RN-PB014	Otaria byronia	South American Sea Lion	Mammal	2023-08-26	Punta Bermeja	Río Negro	-41.1558	-63.1323	Fetus	Not determined	Dead	3 - Moderate decomposition	Positive	Partial	A/South american sea lion/Argentina/RN-PB014/2023	PV717645-PV717652	2	Aborted fetus found on the ground at the sea lion colony, partially consumed post-mortem (a peregrine falcon was seen feeding on the carcass, and kelp gulls were abundant in the area).	Rimondi et al 2024
14	RN-PB015	Sterna hirundinacea	South American Tern	Bird	2023-08-26	Punta Bermeja	Río Negro	-41.1558	-63.1323	Juvenile	Male	Dead	2 - Fresh carcass	Positive	Whole	A/South american tern/Argentina/RN-PB015/2023	OR987121-OR987128	2	Carcass in rigor mortis when examined.	Rimondi et al 2024
15	RN-PB016	Otaria byronia	South American Sea Lion	Mammal	2023-08-26	Punta Bermeja	Río Negro	-41.1558	-63.1323	Adult	Female	Dead	2 - Fresh carcass	Positive	NA	NA	NA	NA	Carcass in rigor mortis.	Rimondi et al 2024
16	RN-PB017	Otaria byronia	South American Sea Lion	Mammal	2023-08-26	Punta Bermeja	Río Negro	-41.1558	-63.1323	Adult	Male	Dead	2 - Fresh carcass	Positive	NA	NA	NA	NA	Carcass in rigor mortis.	Rimondi et al 2024
17	RN-PB018	Otaria byronia	South American Sea Lion	Mammal	2023-08-26	Punta Bermeja	Río Negro	-41.1558	-63.1323	Adult	Male	Dead	2 - Fresh carcass	Positive	NA	NA	NA	NA	Carcass in rigor mortis.	Rimondi et al 2024
18	RN-PB019	Arctocephalus australis	South American Fur Seal	Mammal	2023-08-26	Punta Bermeja	Río Negro	-41.1558	-63.1323	Juvenile	Male	Dead	2 - Fresh carcass	Positive	Whole	A/South american fur seal/Argentina/RN-PB019/2023	OR987113-OR987120	2	Carcass still warm and in rigor mortis.	Rimondi et al 2024
19	RN-PB020	Podiceps major	Great Grebe	Bird	2023-08-26	Punta Bermeja	Río Negro	-41.1558	-63.1323	Adult	Male	Dead	2 - Fresh carcass	Positive	NA	NA	NA	NA	Carcass in rigor mortis. Testes were small and pale (inactive).	Rimondi et al 2024
20	CH-PD027	Mirounga leonina	Southern Elephant Seal	Mammal	2023-10-10	Punta Delgada	Chubut	-42.764	-63.6326	Calf/pup	Not determined	Dead	2 - Fresh carcass	Positive	Partial	A/southern elephant seal/Argentina/CH-PD027/2023	PQ002111-PQ002118	2	Found on the intertidal zone without being covered with sand (i.e. death <12 h). Eyes removed.	Uhart et al 2024
21	CH-PD028	Sterna hirundinacea	South American Tern	Bird	2023-10-10	Punta Delgada	Chubut	-42.764	-63.6326	Adult	Not determined	Dead	2 - Fresh carcass	Positive	NA	NA	NA	NA	Non-breeding plumage. Moderate congestion of the brain and lungs.	Uhart et al 2024
22	CH-PD029	Sterna hirundinacea	South American Tern	Bird	2023-10-10	Punta Delgada	Chubut	-42.764	-63.6326	Adult	Not determined	Dead	2 - Fresh carcass	Positive	NA	NA	NA	NA	Non-breeding plumage. Moderate congestion of the brain and lungs.	Uhart et al 2024
23	CH-PD030	Sterna hirundinacea	South American Tern	Bird	2023-10-10	Punta Delgada	Chubut	-42.764	-63.6326	Adult	Not determined	Dead	2 - Fresh carcass	Positive	Whole	A/South American tern/Argentina/CH-PD030/2023	PP488326-PP488333	2	Non-breeding plumage. Eyes seem pale and opaque (possible corneal edema). Moderate-to-severe congestion of the brain. Moderate congestion of the lungs.	Uhart et al 2024
24	CH-PD031	Sterna hirundinacea	South American Tern	Bird	2023-10-10	Punta Delgada	Chubut	-42.764	-63.6326	Adult	Not determined	Dead	2 - Fresh carcass	Positive	NA	NA	NA	NA	Non-breeding plumage.	Uhart et al 2024
25	CH-PD032	Mirounga leonina	Southern Elephant Seal	Mammal	2023-10-10	Punta Delgada	Chubut	-42.764	-63.6326	Calf/pup	Not determined	Dead	2 - Fresh carcass	Positive	Whole	A/southern elephant seal/Argentina/CH-PD032/2023	PQ002143-PQ002150	2	Found on the intertidal zone without being covered with sand (i.e. death <12 h). Eyes present and ocular mucosa severely congested. Small amount of white foam coming out of nostrils. Severe congestion of the lungs.	Uhart et al 2024
26	CH-PD033	Mirounga leonina	Southern Elephant Seal	Mammal	2023-10-10	Punta Delgada	Chubut	-42.764	-63.6326	Calf/pup	Not determined	Dead	2 - Fresh carcass	Positive	NA	NA	NA	NA	Found on the intertidal zone without being covered with sand, still in rigor mortis (i.e. death <8 h). Large amount of white foam coming out of nostrils and in the trachea.	Uhart et al 2024
27	CH-PD034	Thalasseus maximus	Royal Tern	Bird	2023-10-10	Punta Delgada	Chubut	-42.764	-63.6326	Adult	Not determined	Dead	3 - Moderate decomposition	Positive	NA	NA	NA	NA	Breeding plumage. Moderate-to-severe congestion of the brain and lungs.	Uhart et al 2024
28	CH-PD035	Mirounga leonina	Southern Elephant Seal	Mammal	2023-10-10	Punta Delgada	Chubut	-42.764	-63.6326	Calf/pup	Not determined	Dead	2 - Fresh carcass	Positive	Whole	A/southern elephant seal/Argentina/CH-PD035/2023	PP488310-PP488317	2	Found on the intertidal zone without being covered with sand (i.e. death <12 h). Eyes present. Moderate congestion of the lungs.	Uhart et al 2024
29	CH-PD036	Thalasseus maximus	Royal Tern	Bird	2023-10-10	Punta Delgada	Chubut	-42.764	-63.6326	Adult	Female	Dead	2 - Fresh carcass	Positive	Whole	A/royal tern/Argentina/CH-PD036/2023	PP488334-PP488341	1	Breeding plumage. Mild congestion of the brain. Moderate-to-severe congestion of the lungs. Ovaries fully developed and with numerous follicles (largest at 1-2 mm). Empty stomach. Moderate congestion of the kidneys. Large lardaceous clots seen in the heart.	Uhart et al 2024
30	CH-PD037	Sterna hirundinacea	South American Tern	Bird	2023-10-10	Punta Delgada	Chubut	-42.764	-63.6326	Juvenile	Not determined	Dead	2 - Fresh carcass	Positive	Whole	A/South American tern/Argentina/CH-PD037/2023	PP488342-PP488349	2	Non-breeding plumage, mottled feathers on upper part of wings (juvenile/subadult). Mild congestion of the brain.	Uhart et al 2024
31	CH-PD038	Sterna hirundinacea	South American Tern	Bird	2023-10-10	Punta Delgada	Chubut	-42.764	-63.6326	Adult	Female	Dead	2 - Fresh carcass	Positive	NA	NA	NA	NA	Non-breeding plumage. Moderate-to-severe congestion of the lungs. Ovaries not completely developed and only has a few small follicles (largest <1 mm). Empty stomach. Moderate congestion of the kidneys.	Uhart et al 2024
32	CH-PM053	Mirounga leonina	Southern Elephant Seal	Mammal	2023-11-01	Puerto Madryn	Chubut	-42.5975	-64.8189	Sub-adult	Male	Dead	2 - Fresh carcass	Positive	Whole	A/southern elephant seal/Argentina/CH-PM053/2023	PP488310-PP488317	1	Category sub-adult male 1. First seen alive around 17:30h on 30/10/2023 showing lethargy, tremors, labored breathing. Was still alive around 12:00h of 01/11/2023, now showing abundant yellowish nasal discharge. Found dead on 17:00h of 01/11/2023, then showing blood-stained nasal discharge. Sampled at approximately 19:00h of the same day. During dissection, the muscles and blood felt extremely war…	Uhart et al 2024
33	CH-LA067	Otaria byronia	South American Sea Lion	Mammal	2023-11-21	La Armonía	Chubut	-42.1467	-64.0126	Fetus	Female	Dead	2 - Fresh carcass	Negative	NA	NA	NA	NA	Late-term fetus found on the beach, with kelp gulls scavenging on umbilicus. Possible female (based on inguinal inspection). Left eye had been removed, but right eye remained untouched. Lungs are show moderate-severe congestion and did not float in formalin. Moderate congestion of the brain. Small multifocal petechial haemorrhage on right eye sclera, near the insertion of ocular muscles. Kidney s…	Novel data
34	CH-LA068	Larus dominicanus	Kelp Gull	Bird	2023-11-21	La Armonía	Chubut	-42.1467	-64.0126	Adult	Not determined	Dead	2 - Fresh carcass	Negative	NA	NA	NA	NA	Periorbital feathers stuck together (ocular discharge). Pericloacal feathers soiled with abundant brown feces (watery diarrhea). Mild-moderate congestion of the brains. Moderate-severe congestion of the lungs.	Novel data
35	CH-LA069	Larus dominicanus	Kelp Gull	Bird	2023-11-21	La Armonía	Chubut	-42.1467	-64.0126	Sub-adult	Male	Dead	2 - Fresh carcass	Negative	NA	NA	NA	NA	Juvenile plumage (possibly third year). Periorbital feathers stuck together (ocular discharge). Pericloacal feathers soiled with abundant brown feces (watery diarrhea). Poor body condition, with no fat stores and marked atrophy of pectoral muscles. Liver appears slightly atrophied. Cloaca markedly distended with watery feces. Moderate congestion of the brain, lungs, mesenterium and kidneys. Pancr…	Novel data
36	CH-CV092	Tachycineta leucopyga	Chilean Swallow	Bird	2024-02-09	Caleta Valdés	Chubut	-42.5084	-63.6002	Adult	Not determined	Dead	2 - Fresh carcass	Negative	NA	NA	NA	NA	Found dead next to the tourist trail, apparently recently deceased but not in rigor mortis.	Novel data
37	CH-PM021	Podiceps occipitalis	Silvery Grebe	Bird	2023-09-23	Puerto Madryn	Chubut	-42.7846	-65.0058	Adult	Not determined	Dead	2 - Fresh carcass	Negative	NA	NA	NA	NA	Lethargy, head tremors, drooping wings, dyspnea. Died approximately 1 hour after having been found. Sampled immediately after death.	Novel data
38	CH-PM022	Eubalaena australis	Southern Right Whale	Mammal	2023-08-15	Puerto Madryn	Chubut	-42.7811	-65.0016	Calf/pup	Female	Dead	2 - Fresh carcass	Negative	NA	NA	NA	NA	Animal with a large amount of intestinal content, recently fed. Bladder with abundant presence of urine.	Novel data
39	CH-PM023	Eubalaena australis	Southern Right Whale	Mammal	2023-08-27	Puerto Madryn	Chubut	-42.803	-64.9317	Calf/pup	Not determined	Dead	3 - Moderate decomposition	Negative	NA	NA	NA	NA	External inspection only.	Novel data
40	CH-PM024	Eubalaena australis	Southern Right Whale	Mammal	2023-09-16	Puerto Madryn	Chubut	-42.6212	-64.9338	Calf/pup	Male	Dead	2 - Fresh carcass	Negative	NA	NA	NA	NA	Lungs show signs of congestion, bronchi and bronchioles compromised, with white foam. Apparent infectious signs.	Novel data
41	CH-PM093	Thalasseus eurygnathus	Cayenne Tern	Bird	2024-02-10	Puerto Madryn	Chubut	-42.7812	-65.0015	Adult	Not determined	Dead	2 - Fresh carcass	Positive	Partial	A/Cayenne tern/Argentina/CH-PM093/2024	PV717661-PV717665	2	Non-breeding plumage. Found alive but lethargic around 11:30h by a citizen, who moved it to a more protected area and warned lifeguards. By 14:00h when the park rangers were able to go to the site, it was dead with a twisted neck posture. Pericloacal feathers were soiled with diarrheic feces.	Novel data
42	CH-PD058	Larus dominicanus	Kelp Gull	Bird	2023-11-13	Punta Delgada	Chubut	-42.764	-63.6326	Adult	Female	Dead	2 - Fresh carcass	Negative	NA	NA	NA	NA	Carcass in rigor mortis when found, with belly up, neck partly twisted and wings partly open. Good body condition with abundant subcutaneous and visceral fat stocks. Marked mydriasis. Moderate congestion of the lungs. Multifocal petechial haemorrhage on the surface of the cerebellum (moderate). Liver multifocal petechial haemorrhage (mild-moderate). Egg yolk in the abdomen, unclear whether a foll…	Novel data
43	CH-PD061	Mirounga leonina	Southern Elephant Seal	Mammal	2023-11-03	Punta Delgada	Chubut	-42.764	-63.6326	Adult	Female	Live	1 - Live symptomatic	Negative	NA	NA	NA	NA	Female, relatively small and with no pup. Good body condition. Lethargy and hesitation to move away when approached. Superficial cut wound transversal to the chest, behind the forelimbs (possible entanglement). Left a trail of fresh and watery feces (colors ranging from green to orange-red), which were sampled.	Novel data
44	CH-PD062	Sterna hirundinacea	South American Tern	Bird	2023-11-03	Punta Delgada	Chubut	-42.764	-63.6326	Adult	Female	Dead	2 - Fresh carcass	Positive	Whole	A/South American tern/Argentina/CH-PD062/2023	PV717706-PV717713	2	Non-breeding plumage. Found belly down, still in rigor mortis, with neck partly twisted and wings partly open. Poor body condition. Mild-moderate congestion of the brain. Moderate congestion of the lungs. Moderate multifocal petechial haemorrhage of the pancreas. Reproductive tract fully developed but inactive (evenly-sized follicles close to 1 mm).	Novel data
45	CH-PL039	Thalasseus eurygnathus	Cayenne Tern	Bird	2023-10-19	Punta León	Chubut	-43.065	-64.4597	Adult	Not determined	Dead	2 - Fresh carcass	Positive	Whole	A/Cayenne tern/Argentina/CH-PL039/2023	PV717738-PV717745	1	Breeding plumage. Moderate congestion of the brain and lungs.	Novel data
46	CH-PL040	Thalasseus maximus	Royal Tern	Bird	2023-10-19	Punta León	Chubut	-43.065	-64.4597	Adult	Female	Dead	2 - Fresh carcass	Positive	Whole	A/royal tern/Argentina/CH-PL040/2023	PV717762-PV717769	1	Breeding plumage. Found dead in unusual posture (chest to the ground, open wings, head resting on bill tip). Mild corneal edema. Small ammount of diarrheic feces come out when carcass is lifted. Mild-to-moderate congestion of the brain. Moderate congestion of the lungs. Excellent body condition with large abdominal fat stores. Mild petechial hemorrhage on panchreas. Gallbladder full. One egg pres…	Novel data
47	CH-PL041	Sterna hirundinacea	South American Tern	Bird	2023-10-19	Punta León	Chubut	-43.065	-64.4597	Adult	Not determined	Dead	2 - Fresh carcass	Positive	Whole	A/South American tern/Argentina/CH-PL041/2023	PV717714-PV717721	1	Non-breeding plumage. Mild congestion of the brain. Mild-to-moderate congestion of the lungs.	Novel data
48	CH-PL042	Thalasseus eurygnathus	Cayenne Tern	Bird	2023-10-19	Punta León	Chubut	-43.065	-64.4597	Adult	Female	Dead	2 - Fresh carcass	Positive	Whole	A/Cayenne tern/Argentina/CH-PL042/2023	PV717746-PV717753	1	Breeding plumage. Mild-to-moderate congestion of the brain. Moderate lung congestion. Good body condition with abundant pericardial fat and some abdominal fat. Spleen normal. Moderate petechial haemorrhage of the panchreas.	Novel data
49	CH-PL043	Thalasseus maximus	Royal Tern	Bird	2023-10-19	Punta León	Chubut	-43.065	-64.4597	Adult	Male	Dead	2 - Fresh carcass	Positive	Whole	A/royal tern/Argentina/CH-PL043/2023	PV717770-PV717777	1	Breeding plumage. Seen alive approximately 30 min before death presenting with neurological signs (drooping wings, unable to stand up or walk, opisthotonos and severe torticollis, seizure-like spasms, dyspnoea). Found dead in unusual position (chest to the ground, wings partly open, neck arched back with beak pointing to the sky). Midriasis and mild corneal edema. Moderate congestion of the brain…	Novel data
50	CH-PL044	Larus dominicanus	Kelp Gull	Bird	2023-10-19	Punta León	Chubut	-43.065	-64.4597	Adult	Not determined	Dead	2 - Fresh carcass	Positive	NA	NA	NA	NA	Mild congestion of the brain. Mild-to-moderate congestion of the lungs.	Novel data
51	CH-PL045	Thalasseus eurygnathus	Cayenne Tern	Bird	2023-10-19	Punta León	Chubut	-43.065	-64.4597	Adult	Female	Dead	2 - Fresh carcass	Positive	NA	NA	NA	NA	Breeding plumage. Found dead in unusual posture (chest to the ground, open wings, head resting on bill tip). Moderate congestion of the brain and lungs. Good body condition with abundant pericardial fat and moderate abdominal fat stores. Petechial hemorrhage on epicardium with injected coronary veins. Pancreas normal except haemorrhagic tip. Small intestines moderately congested. Spleen small but…	Novel data
52	CH-PL046	Sterna hirundinacea	South American Tern	Bird	2023-10-19	Punta León	Chubut	-43.065	-64.4597	Adult	Not determined	Dead	2 - Fresh carcass	Positive	NA	NA	NA	NA	Non-breeding plumage. Moderate congestion of the brain and lungs.	Novel data
53	CH-PL047	Larus dominicanus	Kelp Gull	Bird	2023-10-19	Punta León	Chubut	-43.065	-64.4597	Adult	Not determined	Dead	2 - Fresh carcass	Positive	Whole	A/kelp gull/Argentina/CH-PL047/2023	PV717666-PV717673	1	Unilateral conjunctivitis. Moderate congestion of the brain. Mild congestion of the lungs.	Novel data
54	CH-PL054	Leucocarbo atriceps	Imperial Cormorant	Bird	2023-11-03	Punta León	Chubut	-43.065	-64.4597	Adult	Female	Dead	2 - Fresh carcass	Positive	Whole	A/imperial cormorant/Argentina/CH-PL054/2023	PV717674-PV717681	2	Breeding plumage. Severe neurological signs. Euthanised (cervical dislocation). Moderate congestion of the brain. Empty stomach, a few tiny shell fragments. Congestive heart, with some fat. Not much pectoral muscle. Many ovary follicules.	Novel data
55	CH-PL055	Leucocarbo atriceps	Imperial Cormorant	Bird	2023-11-03	Punta León	Chubut	-43.065	-64.4597	Adult	Not determined	Dead	2 - Fresh carcass	Positive	NA	NA	NA	NA	Breeding plumage. Found dead belly down, legs stretched behind, wings slightly open, back feathers slightly roughled.	Novel data
56	CH-PL056	Sterna hirundinacea	South American Tern	Bird	2023-11-03	Punta León	Chubut	-43.065	-64.4597	Juvenile	Not determined	Dead	2 - Fresh carcass	Positive	NA	NA	NA	NA	Found belly down. Mottled feathers on upper part of wings. Few fly larvae in mouth. Moderate congestion of the brain.	Novel data
57	CH-PL057	Sterna hirundinacea	South American Tern	Bird	2023-11-03	Punta León	Chubut	-43.065	-64.4597	Adult	Not determined	Dead	3 - Moderate decomposition	Positive	Whole	A/South American tern/Argentina/CH-PL057/2023	PV717722-PV717729	2	Non-breeding plumage. Green staining of cloaca. Fly larvae in mouth.	Novel data
58	CH-PL059	Leucocarbo atriceps	Imperial Cormorant	Bird	2023-11-19	Punta León	Chubut	-43.065	-64.4597	Adult	Male	Dead	2 - Fresh carcass	Negative	NA	NA	NA	NA	Plastic band labelled BBG (red) on right tarsus, which had been deployed by Dr. Flavio Quintana on 3-Dec-2005 when the bird was already adult-plumaged. Carcass in rigor mortis, with belly up and neck partly twisted. Good body condition with some subcutaneous and visceral fat stocks. Feet appear reddened, veins are enlarged and readily visible. Feces surrounding the cloaca stained with feces (diar…	Novel data
59	CH-PL060	Thalasseus maximus	Royal Tern	Bird	2023-11-19	Punta León	Chubut	-43.065	-64.4597	Adult	Not determined	Dead	2 - Fresh carcass	Positive	Whole	A/royal tern/Argentina/CH-PL060-063/2023	PV717778-PV717785	2	Breeding plumage. Small amount of pasty feces on feathers near cloaca. Mild-moderate brain congestion. Moderate-severe lung congestion.	Novel data
60	CH-PL063	Thalasseus maximus	Royal Tern	Bird	2023-11-19	Punta León	Chubut	-43.065	-64.4597	Adult	Not determined	Dead	2 - Fresh carcass	Positive					Breeding plumage. Moderate brain congestion. Mild-moderate lung congestion.	Novel data
61	CH-PL064	Thalasseus eurygnathus	Cayenne Tern	Bird	2023-11-19	Punta León	Chubut	-43.065	-64.4597	Adult	Not determined	Dead	2 - Fresh carcass	Positive	Whole	A/Cayenne tern/Argentina/CH-PL064-065/2023	PV717754-PV717761	2	Breeding plumage. Mild brain congestion. Moderate lung congestion.	Novel data
62	CH-PL065	Thalasseus eurygnathus	Cayenne Tern	Bird	2023-11-19	Punta León	Chubut	-43.065	-64.4597	Adult	Not determined	Dead	2 - Fresh carcass	Positive					Breeding plumage. Moderate brain congestion. Moderate-severe lung congestion.	Novel data
63	CH-PL066	Larus dominicanus	Kelp Gull	Bird	2023-11-19	Punta León	Chubut	-43.065	-64.4597	Adult	Not determined	Live	1 - Live symptomatic	Positive	NA	NA	NA	NA	Found on the beach (below the high-tide line), with belly up. Unable to right itself or walk/lethargic, barely moving wings or feet, but with bright eyes looking at humans when approach. Mildly swollen periorbital soft tissues (bilateral) but without excessive ocular discharge. Feces surrounding the cloaca stained with feces (diarrhea).	Novel data
64	CH-PT025	Spheniscus magellanicus	Magellanic Penguin	Bird	2023-10-05	Punta Tombo	Chubut	-44.0457	-65.2257	Adult	Male	Live	1 - Live symptomatic	Negative	NA	NA	NA	NA	Struggling to stand up or walk (neck arching backwards or stretching cranially, side stepping, falling over or back), apparent exhaustion/labored breathing, scruffy-looking plumage. Found very close to tourism walkway. On the following day was observed again but looked better, still struggling to walk ("woozy") but not as much.	Novel data
65	CH-PT026	Spheniscus magellanicus	Magellanic Penguin	Bird	2023-10-05	Punta Tombo	Chubut	-44.0467	-65.225	Adult	Male	Live	1 - Live symptomatic	Negative	NA	NA	NA	NA	Lethargy, open-beak breathing, palpebral edema, translucent ocular discharge. Belonged to a monitored nest. Was followed through several days and did not show significant clinical improvement or worsening, nor did its partner show clinical signs.	Novel data
66	CH-PT087	Otaria byronia	South American Sea Lion	Mammal	2024-01-12	Punta Tombo	Chubut	-44.0413	-65.2027	Adult	Not determined	Dead	4 - Advanced decomposition	Positive	NA	NA	NA	NA	Carcass had been seen on 07/01/2024. Partially consumed by maggots but still had intact thoracic cavity and abundant brain matter.	Novel data
67	CH-PT088	Otaria byronia	South American Sea Lion	Mammal	2024-01-12	Punta Tombo	Chubut	-44.0377	-65.2047	Adult	Not determined	Dead	4 - Advanced decomposition	Positive	Whole	A/South American sea lion/Argentina/CH-PT088/2024	PV717682-PV717689	2	Carcass had been seen on 07/01/2024. A juvenile sea lion was seen resting next to the carcass when it was revisited on 12/01/2024. Partially consumed by maggots, with thorax cavity exposed, but still with abundant brain matter.	Novel data
68	CH-PT089	Stercorarius antarcticus	Brown Skua	Bird	2024-01-12	Punta Tombo	Chubut	-44.0365	-65.1941	Adult	Not determined	Live	1 - Live symptomatic	Negative	NA	NA	NA	NA	Symptomatic bird (lethargy, sitting down with drooping wings, weakness and failure to fly away when approached) found on the beach, hiding next to rocks on the high tide line. Pericloacal feathers stained with watery diarrhea. No signs of conjunctivitis nor difficulty breathing. Poor body condition.	Novel data
69	CH-PT090	Otaria byronia	South American Sea Lion	Mammal	2024-01-12	Punta Tombo	Chubut	-44.0366	-65.1949	Juvenile	Not determined	Dead	3 - Moderate decomposition	Negative	NA	NA	NA	NA	Carcass was mildly bloated but still intact and with all viscera and brain fully recogniseable and with somewhat firm texture, without maggots.	Novel data
70	CH-PT091	Larus dominicanus	Kelp Gull	Bird	2024-01-12	Punta Tombo	Chubut	-44.0366	-65.1949	Adult	Not determined	Live	1 - Live symptomatic	Negative	NA	NA	NA	NA	Symptomatic bird (lethargy, standing with drooping wings and failure to fly away when approached, ruffled feathers, partly closed right eye as if photosensitive) found on the beach, on the sand above the tide line. Abundant watery ocular discharge on the right eye. No sign of diarrhea nor difficulty breathing.	Novel data
71	CH-CA048	Larus dominicanus	Kelp Gull	Bird	2023-10-22	Camarones	Chubut	-44.8019	-65.7014	Adult	Not determined	Dead	2 - Fresh carcass	Positive	NA	NA	NA	NA	Fecal staining consistent with watery diarrhea. Periocular feathers wet, consistent with unilateral conjunctivitis. Moderate congestion of the brain and lungs. Found dead within 20 meters of a potentially symptomatic sea lion (lethargic, struggling to walk) and 50 meters from 2 asymptomatic sea lions.	Novel data
72	CH-CA049	Sterna hirundinacea	South American Tern	Bird	2023-10-24	Camarones	Chubut	-44.8005	-65.7032	Adult	Not determined	Dead	2 - Fresh carcass	Positive	Whole	A/South American tern/Argentina/CH-Cam049/2023	PV717653-PV717659, and PV717834	1	Breeding plumage. Mild corneal edema. Moderate congestion of the brain and lungs.	Novel data
73	CH-CA050	Sterna hirundinacea	South American Tern	Bird	2023-10-24	Camarones	Chubut	-44.8019	-65.7015	Adult	Not determined	Dead	2 - Fresh carcass	Positive	NA	NA	NA	NA	Non-breeding plumage. Found in an awkward position with twisted neck within a rock crevice. Diarrhea staining of feathers. Moderate-to-severe congestion of the brain. Moderate congestion of the lungs.	Novel data
74	CH-CA073	Otaria byronia	South American Sea Lion	Mammal	2023-12-30	Camarones	Chubut	-44.8017	-65.7051	Adult	Female	Dead	3 - Moderate decomposition	Positive	Partial	A/South American sea lion/Argentina/CH-Cam073/2023	NA	NA	Seen alive and lethargic on 28/12/2023 at 12:00, then seen dead at 29/12/2023 at 10:00. By the time of sample collection on 30/12/2023 at 16:00, it had already been largely scavenged (skuas and giant petrels had been seen in the area on 29/12/2023) with holes in the perineum and extensive consumption of the brain, muscles and viscera. Large numbers of eggs and maggots on the face and perineum. St…	Novel data
75	CH-CA074	Tachyeres leucocephalus	White-headed Steamer Duck	Bird	2023-12-31	Camarones	Chubut	-44.8078	-65.7237	Adult	Male	Dead	3 - Moderate decomposition	Negative	NA	NA	NA	NA	Partly scavenged and dehydrated, however neck muscles revealed the carcass was relatively fresh and brain was intact.	Novel data
76	CH-DB051	Thalasseus eurygnathus	Cayenne Tern	Bird	2023-10-27	Cabo Dos Bahías	Chubut	-44.9147	-65.5633	Adult	Not determined	Dead	2 - Fresh carcass	Positive	Whole	A/Cayenne tern/Argentina/CH-CDB051/2023	PV717730-PV717737	1	Breeding plumage. Found with abdomen facing up and in awkward position (wings partly stretched). Pericloacal feathers stained with feces (watery diarrhea). Moderate brain and lung congestion.	Novel data
77	CH-DB052	Sterna hirundinacea	South American Tern	Bird	2023-10-27	Cabo Dos Bahías	Chubut	-44.9103	-65.5447	Adult	Not determined	Dead	2 - Fresh carcass	Positive	Whole	A/South American tern/Argentina/CH-CDB052/2023	PV717698-PV717705	2	Breeding plumage. Found on the mainland peninsula in front of Isla Moreno, approximately 30 metres from the roosting site of terns, within two meters from a dead sea lion, and about 300 metres from the penguin colony. Found in atypical position (wings widely open in awkward position). Still in rigor mortis. Pericloacal feathers stained with feces (watery diarrhea). Mild-to-moderate brain and lung…	Novel data
78	CH-DB075	Otaria byronia	South American Sea Lion	Mammal	2024-01-02	Cabo Dos Bahías	Chubut	-44.9121	-65.5493	Juvenile	Not determined	Dead	5 - Mummified remains	Negative	NA	NA	NA	NA	Mummified carcass. The carcass had been first seen in 19-Sep-2023 but was left untouched until sampling on 2-Jan-2024.	Novel data
79	CH-DB076	Otaria byronia	South American Sea Lion	Mammal	2024-01-02	Cabo Dos Bahías	Chubut	-44.913	-65.5473	Juvenile	Not determined	Dead	5 - Mummified remains	Negative	NA	NA	NA	NA	Mummified carcass. Scavenging by kelp gulls was witnessed. The carcass had been first seen in 23-Oct-2023 but was left untouched until sampling on 2-Jan-2024.	Novel data
80	CH-DB077	Otaria byronia	South American Sea Lion	Mammal	2024-01-02	Cabo Dos Bahías	Chubut	-44.9123	-65.5465	Juvenile	Not determined	Dead	5 - Mummified remains	Negative	NA	NA	NA	NA	Mummified carcass. The carcass had been first seen in 19-Sep-2023 but was left untouched until sampling on 2-Jan-2024.	Novel data
81	CH-DB078	Otaria byronia	South American Sea Lion	Mammal	2024-01-02	Cabo Dos Bahías	Chubut	-44.9118	-65.5448	Juvenile	Not determined	Dead	5 - Mummified remains	Negative	NA	NA	NA	NA	Mummified carcass. The carcass had been first seen in 19-Sep-2023 but was left untouched until sampling on 2-Jan-2024.	Novel data
82	CH-DB079	Otaria byronia	South American Sea Lion	Mammal	2024-01-02	Cabo Dos Bahías	Chubut	-44.9113	-65.5445	Juvenile	Not determined	Dead	5 - Mummified remains	Negative	NA	NA	NA	NA	Mummified carcass. The carcass had been first seen in 19-Sep-2023 but was left untouched until sampling on 2-Jan-2024.	Novel data
83	CH-DB080	Arctocephalus australis	South American Fur Seal	Mammal	2024-01-02	Cabo Dos Bahías	Chubut	-44.9111	-65.544	Juvenile	Not determined	Dead	5 - Mummified remains	Positive	NA	NA	NA	NA	Mummified carcass. The carcass had been first seen in the last week of Sep-2023 but was left untouched until sampling on 2-Jan-2024.	Novel data
84	CH-DB081	Otaria byronia	South American Sea Lion	Mammal	2024-01-02	Cabo Dos Bahías	Chubut	-44.9103	-65.5442	Adult	Not determined	Dead	5 - Mummified remains	Positive	NA	NA	NA	NA	Mummified carcass. The carcass had been first seen in 3-Dec-2023 but was left untouched until sampling on 2-Jan-2024.	Novel data
85	CH-DB082	Otaria byronia	South American Sea Lion	Mammal	2024-01-02	Cabo Dos Bahías	Chubut	-44.9106	-65.5438	Juvenile	Not determined	Dead	5 - Mummified remains	Positive	NA	NA	NA	NA	Mummified carcass. The carcass had been first seen in 17-Sep-2023 but was left untouched until sampling on 2-Jan-2024.	Novel data
86	CH-DB083	Otaria byronia	South American Sea Lion	Mammal	2024-01-02	Cabo Dos Bahías	Chubut	-44.9105	-65.5437	Adult	Not determined	Dead	5 - Mummified remains	Positive	NA	NA	NA	NA	Mummified carcass. The carcass had been first seen in 3-Dec-2023 but was left untouched until sampling on 2-Jan-2024.	Novel data
87	CH-DB084	Otaria byronia	South American Sea Lion	Mammal	2024-01-02	Cabo Dos Bahías	Chubut	-44.9106	-65.5434	Adult	Not determined	Dead	4 - Advanced decomposition	Positive	NA	NA	NA	NA	Mummified carcass. The carcass had been first seen in 3-Dec-2023 but was left untouched until sampling on 2-Jan-2024.	Novel data
88	CH-DB085	Otaria byronia	South American Sea Lion	Mammal	2024-01-02	Cabo Dos Bahías	Chubut	-44.9137	-65.5423	Adult	Female	Dead	4 - Advanced decomposition	Positive	NA	NA	NA	NA	Mummified carcass. Fresh carcass found with face and tail in water (temporary pond of rainwater). Apparently drowned in an area that is not usually used by sea lions. The carcass had been first seen in 17-Sep-2023 but was left untouched until sampling on 2-Jan-2024.	Novel data
89	CH-BB070	Calidris fuscicollis	Sanderling	Bird	2023-12-20	Bahía Bustamante	Chubut	-45.1468	-66.4949	Adult	Female	Dead	2 - Fresh carcass	Negative	NA	NA	NA	NA	Non-breeding plumage. Seen antemortem showing lethargy, lack of fear response/inability to fly, and difficulty standing still, which then progressed to head repetitive movements, tipping over to the side, tongue repetitive movements and ultimately death (within 30 minutes from first observation). Excellent body condition. Mild brain congestion. Mild-moderate lung congestion. Multifocal petechiae …	Novel data
90	CH-BB071	Tachyeres leucocephalus	White-headed Steamer Duck	Bird	2023-12-20	Bahía Bustamante	Chubut	-45.1561	-66.5822	Adult	Male	Dead	5 - Mummified remains	Positive	Partial	A/white-headed steamer duck/Argentina/CH-BB071/2023	NA	NA	Found near penguin colony. Carcass had been seen three days earlier by tourism guides. Heavily putrefact and largely dehydrated, with maggots and only small ammounts of soft tissue left in the cranium.	Novel data
91	CH-BB072	Sterna hirundinacea	South American Tern	Bird	2023-12-24	Bahía Bustamante	Chubut	-45.1451	-66.5308	Adult	Male	Dead	2 - Fresh carcass	Positive	Whole	A/South American tern/Argentina/CH-BB072/2023	PV717690-PV717697	2	Found dead on beach shore of Bustamante Bay. Not in rigor mortis but fresh.	Novel data
92	CH-BB086	Phocoena dioptrica	Spectacled Porpoise	Mammal	2024-01-05	Bahía Bustamante	Chubut	-45.1062	-66.5255	Adult	Male	Dead	2 - Fresh carcass	Negative	NA	NA	NA	NA	Found on the afternoon of 04/01/2024, necropsied in the early morning (6:30-10:30 AM) of 05/01/2024. Adult male, with fully developed testes. Coalescing ulcerative lesions on the face, especially on the lower margin of the mandible. Blood leaking from mouth, eyes and blowhole. No evidence of major trauma or entanglement. Good body condition, with approximately 1 cm of blubber on entire body. Stom…	Novel data
93	CH-BB094	Tachyeres leucocephalus	White-headed Steamer Duck	Bird	2024-02-18	Bahía Bustamante	Chubut	-45.1461	-66.4771	Adult	Male	Dead	2 - Fresh carcass	Positive	NA	NA	NA	NA	Adult male, its presumed partner was seen alive alone in the water. The duck was quite fresh, but eyes were sunken/dry. The throat was torn and the tongue was hanging out from the neck. Nothing else was scavenged. A tracheal swab was taken instead of oral.	Novel data
